# Supplementary material
Source: PubMed Central journal article supplement (PMC5412804)
Supplement: EMBR-18-826-s001.pdf [file EMBR-18-826-s001.pdf]

## Expanded View Figures

**Figure EV1. Identification of the CRISPR-Cas systems in *T. onnurineus* and *in vitro* assembly of the ToCsm complex.**

- A Six CRISPR loci identified in the genome of *T. onnurineus* NA1 from the CRISPR database (<http://crispr.u-psud.fr/>).
- B The organization of the *cas* locus in the Type III and the putative Type IV systems. CRISPR loci 1, 3 and 4 are labelled (grey box). White arrows indicate the ORFs.
- C The dotted lines and the blue lines correspond to the elution profile of the ToCsm complex in the absence or presence of the crRNA, respectively. SDS-PAGE analyses of the SEC fractions are shown in the red boxes. The pooled fractions are indicated.

**A**

| CRISPR_id   | Start position | End position | # of spacer | CONSENSUS                      |      |
|-------------|----------------|--------------|-------------|--------------------------------|------|
|             |                |              |             | sequence                       | size |
| NC_011529_1 | 294116         | 295760       | 24          | GTTTCAATTCTCTAGAGTCTTATTGCAAC  | 30   |
| NC_011529_2 | 728608         | 730178       | 23          | GTTTCAATAAGACTCTAAGAGAATTGAAAG | 30   |
| NC_011529_3 | 818816         | 819904       | 16          | GTTCCAGTAGGACAGAATTGTGTGGAAAG  | 29   |
| NC_011529_4 | 828033         | 828820       | 11          | GTTTCAGTAGGACAGAATTGTGTGGAAA   | 28   |
| NC_011529_5 | 994457         | 994969       | 7           | GTTTCAATTCTCTAGAGTCTTATTGCAAC  | 30   |
| NC_011529_6 | 995057         | 997976       | 43          | GTTTCAATTCTCTAGAGCTTATTGCAAC   | 29   |

**B Type III-A system**

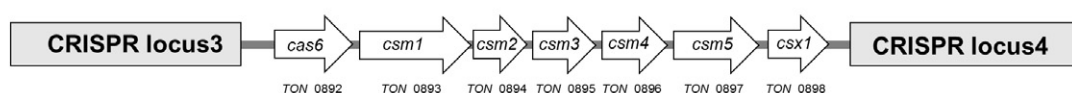

**Putative Type IV system**

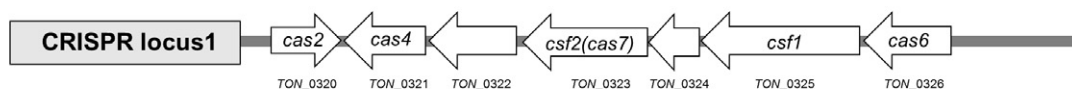

**C**

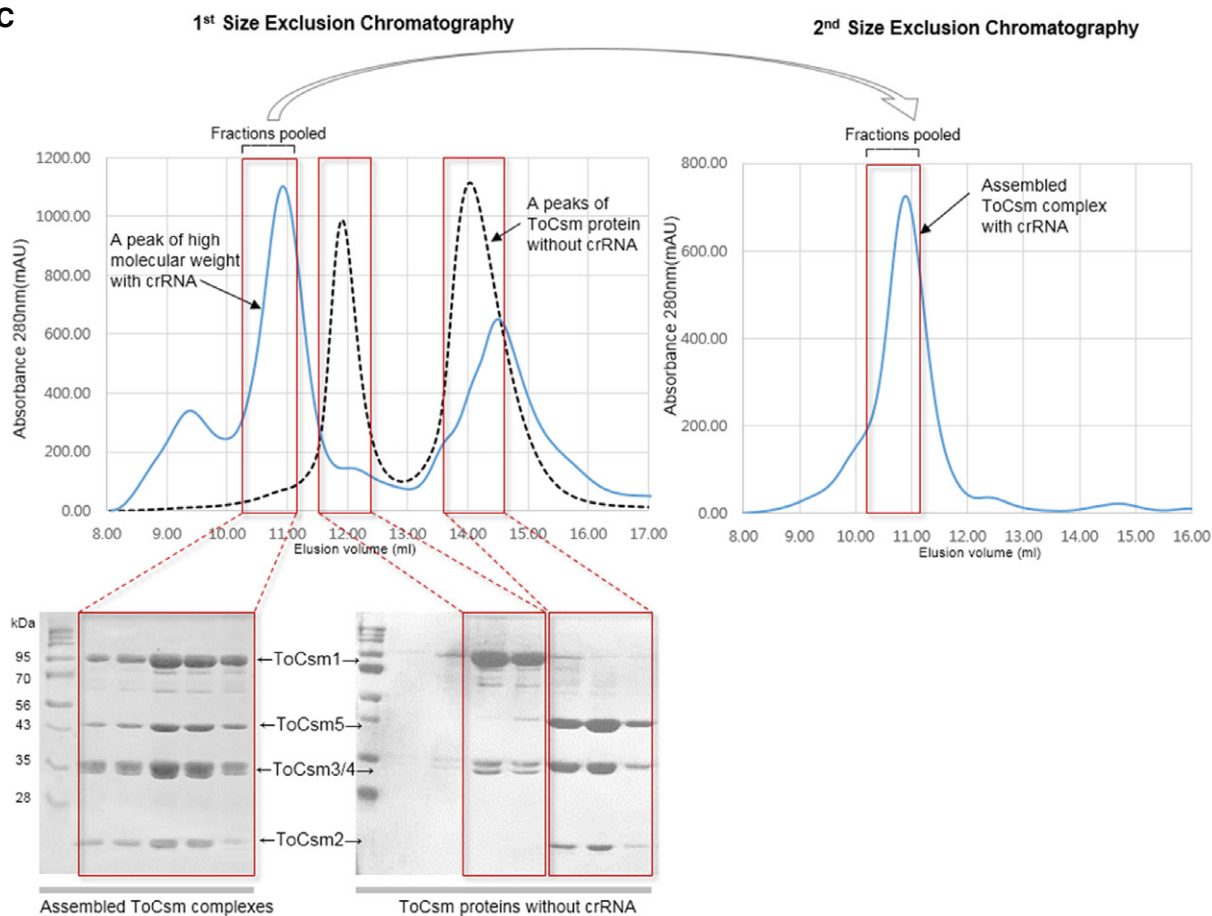

Figure EV1.

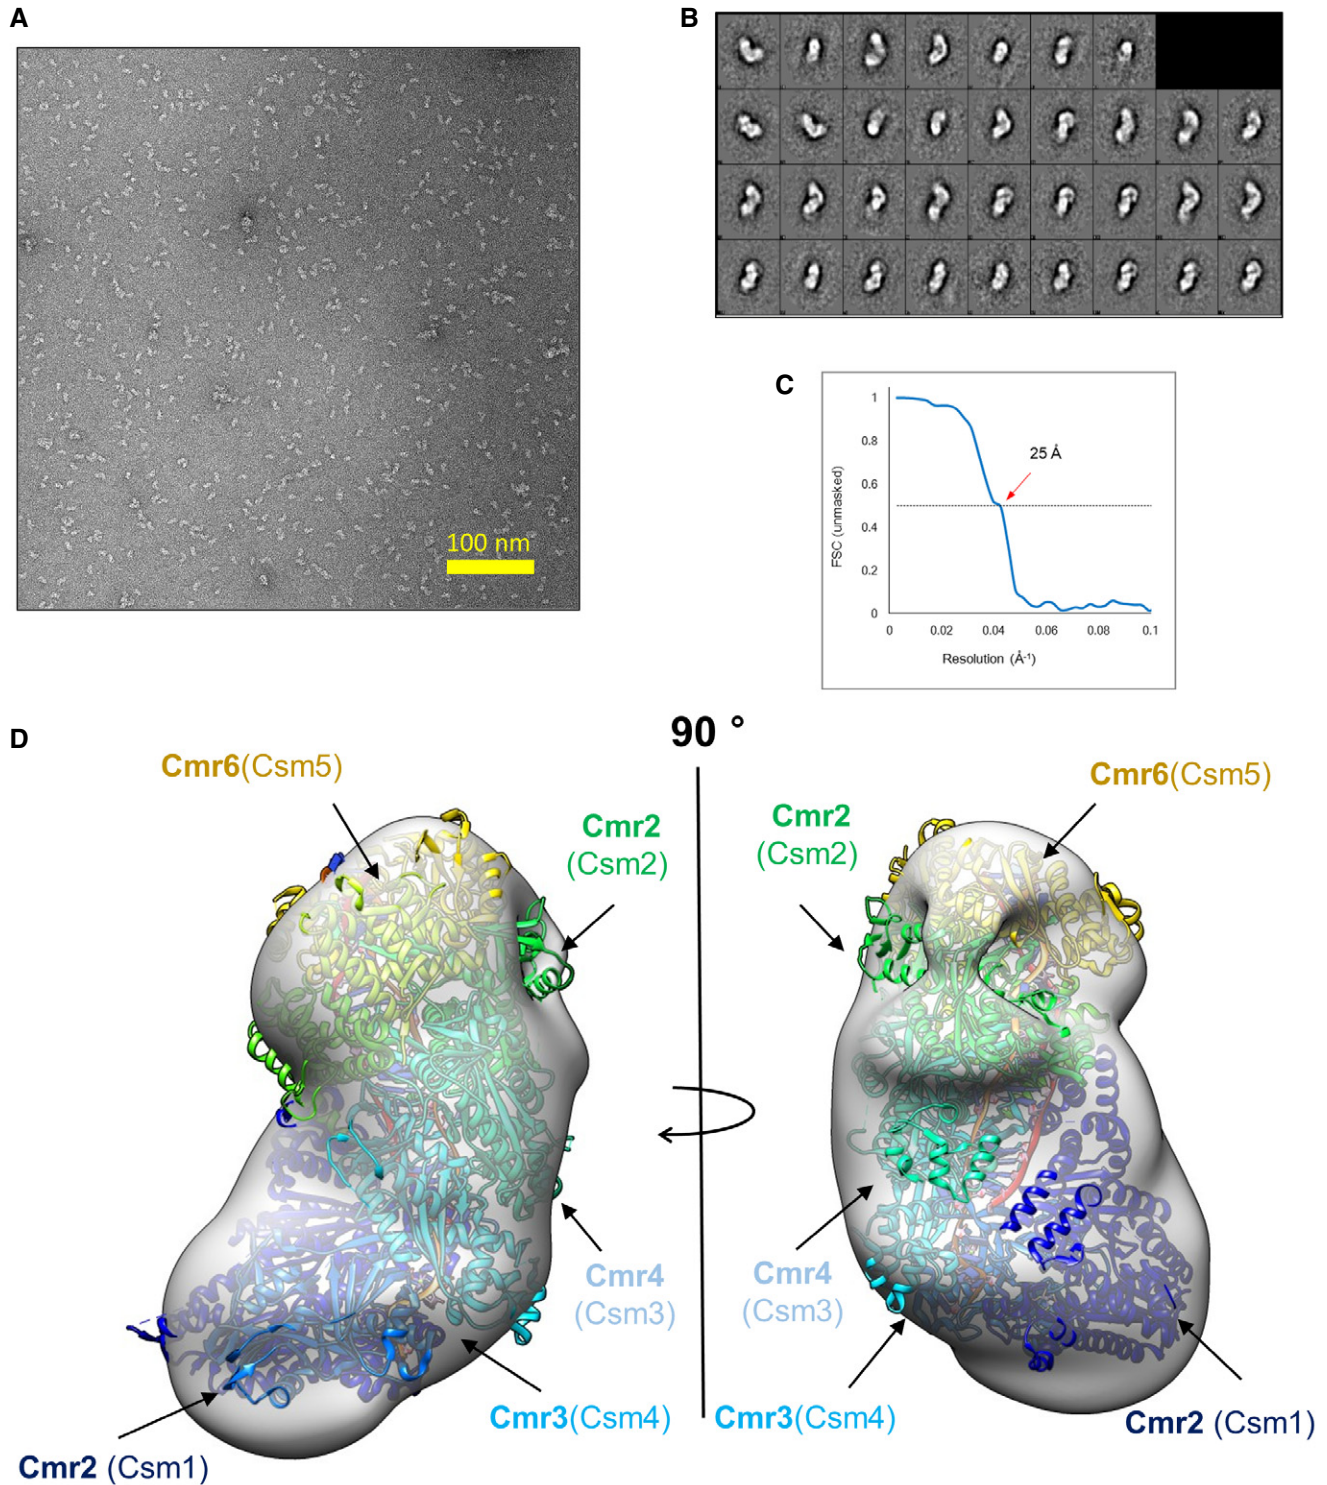

**Figure EV2. EM reconstruction of the ToCsm complex.**

- A Raw micrograph.  
 B Free 2D image classification.  
 C Fourier shell correlation (FSC) plot. The resolution was estimated at an FSC = 0.5 cut-off.  
 D Fit of the Cmr complex structure (PDB ID: 3X1L) into the EM map of the ToCsm complex (EMD-3454). The Cmr subunits are shown in different colours. The corresponding Csm subunits are indicated in brackets.

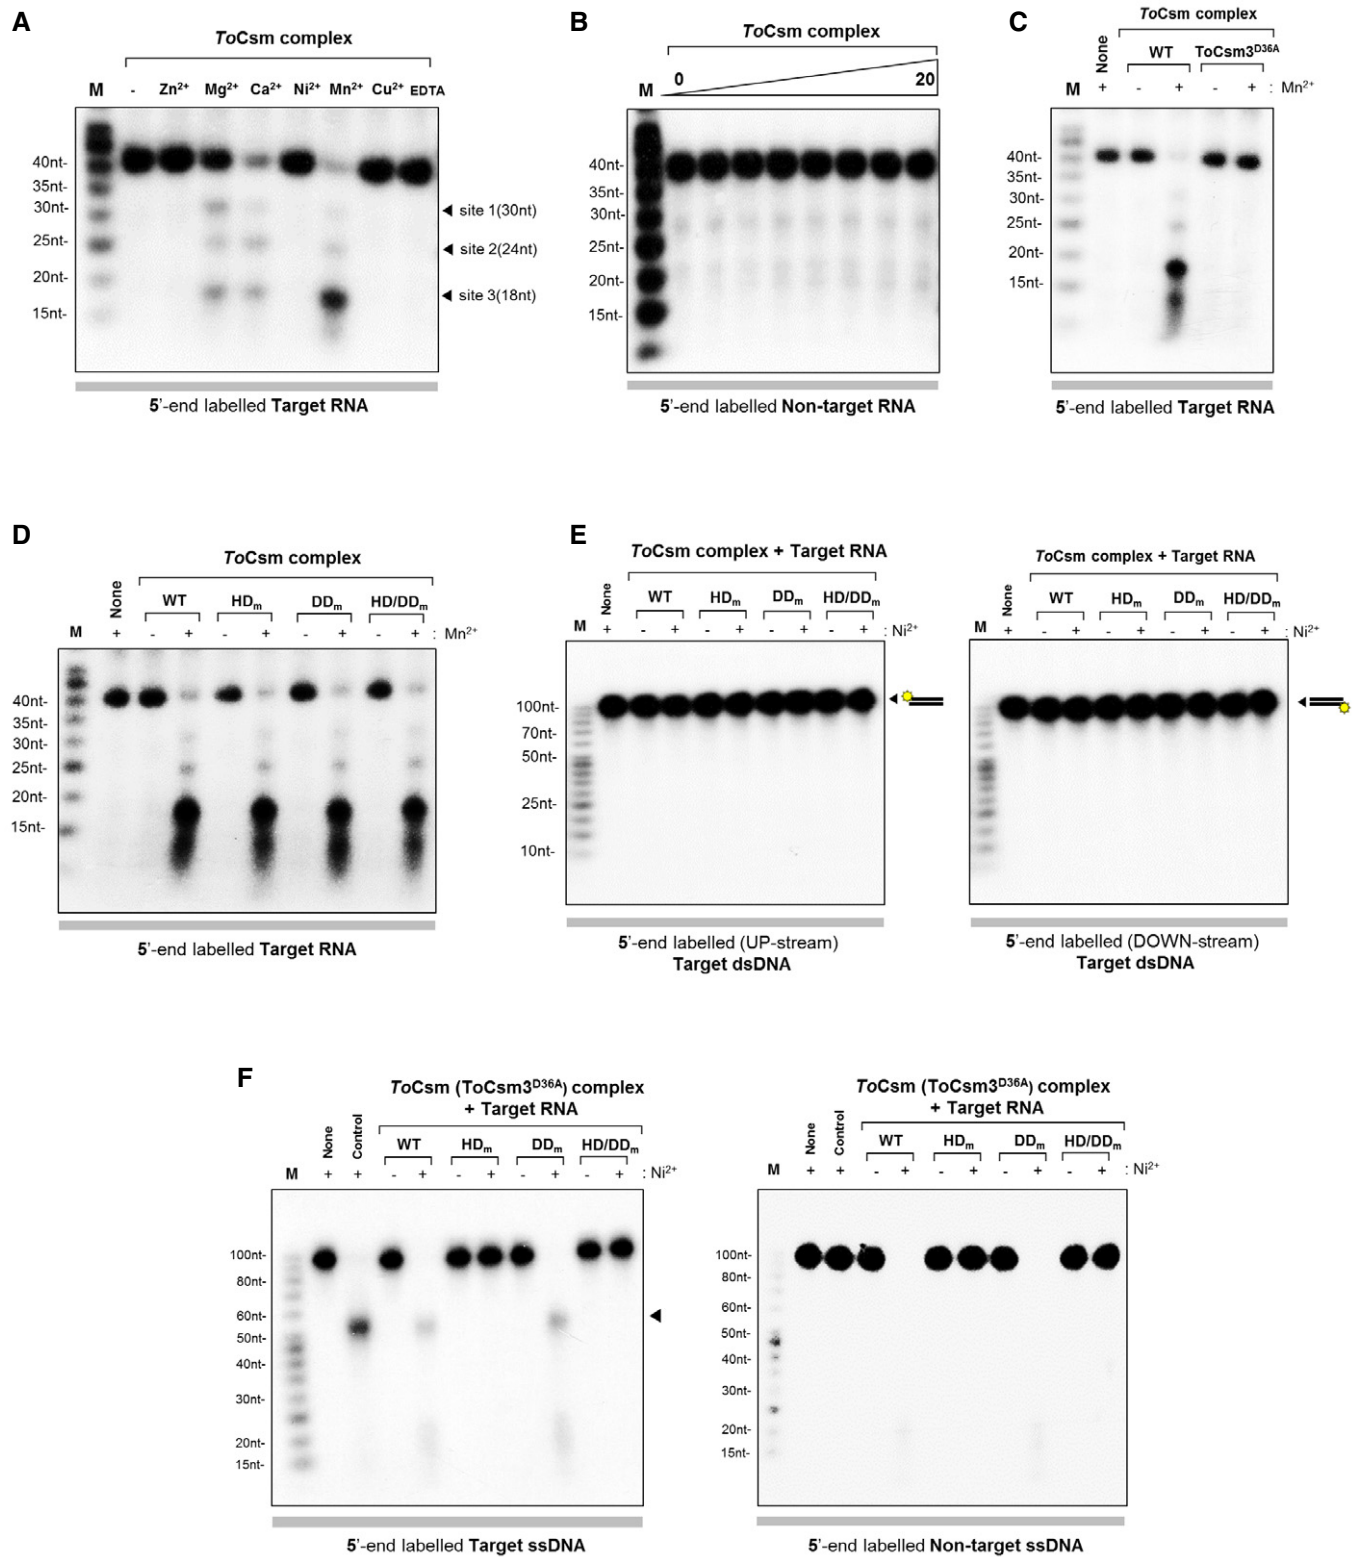

Figure EV3.



**Figure EV3. RNase activity and target RNA-activated ssDNase activity.**

- A Metal ion-dependent RNase activity. The RNase activity was measured in the presence of 5 mM ZnSO<sub>4</sub>, MgCl<sub>2</sub>, CaCl<sub>2</sub>, NiSO<sub>4</sub>, MnCl<sub>2</sub>, CuSO<sub>4</sub> or EDTA.
- B Cleavage assay. Non-target RNA was reacted with the *ToCsm* complex in the presence of 5 mM Mn<sup>2+</sup>.
- C Cleavage of target RNA by wild-type (WT) and mutant *ToCsm* complex (*ToCsm3*<sup>D36A</sup>). The metal ion cofactor Mn<sup>2+</sup> was included in all of the reactions.
- D Cleavage of target RNA by the wild-type *ToCsm* complex and the mutant *ToCsm* complex containing a *ToCsm1* mutant (HD<sub>m</sub>, *ToCsm1*<sup>H14A/D15N</sup>, DD<sub>m</sub>, *ToCsm1*<sup>D587A/D588A</sup>; or HD/DD<sub>m</sub>, *ToCsm1*<sup>H14A/D15N/D587A/D588A</sup>).
- E Cleavage assay. Target dsDNA was reacted with the wild-type or mutant *ToCsm* complex containing the *ToCsm1* mutant (HD<sub>m</sub>, *ToCsm1*<sup>H14A/D15N</sup>, DD<sub>m</sub>, *ToCsm1*<sup>D587A/D588A</sup>, or HD/DD<sub>m</sub>, *ToCsm1*<sup>H14A/D15N/D587A/D588A</sup>) in the presence of the target RNA. Two dsDNA substrates were labelled at one of the two 5' ends, respectively.
- F Cleavage assay. Target ssDNA (left) and non-target ssDNA (right) were incubated with the *ToCsm* complex containing *ToCsm3*<sup>D36A</sup> and wild-type or mutant *ToCsm1* (HD<sub>m</sub>, DD<sub>m</sub> or HD/DD<sub>m</sub>) in the presence of the target RNA. "Control" represents the reaction with the wild-type *ToCsm* complex in the absence of the target RNA. The arrow in the left panel indicates the largest cleavage fragment.

Source data are available online for this figure.

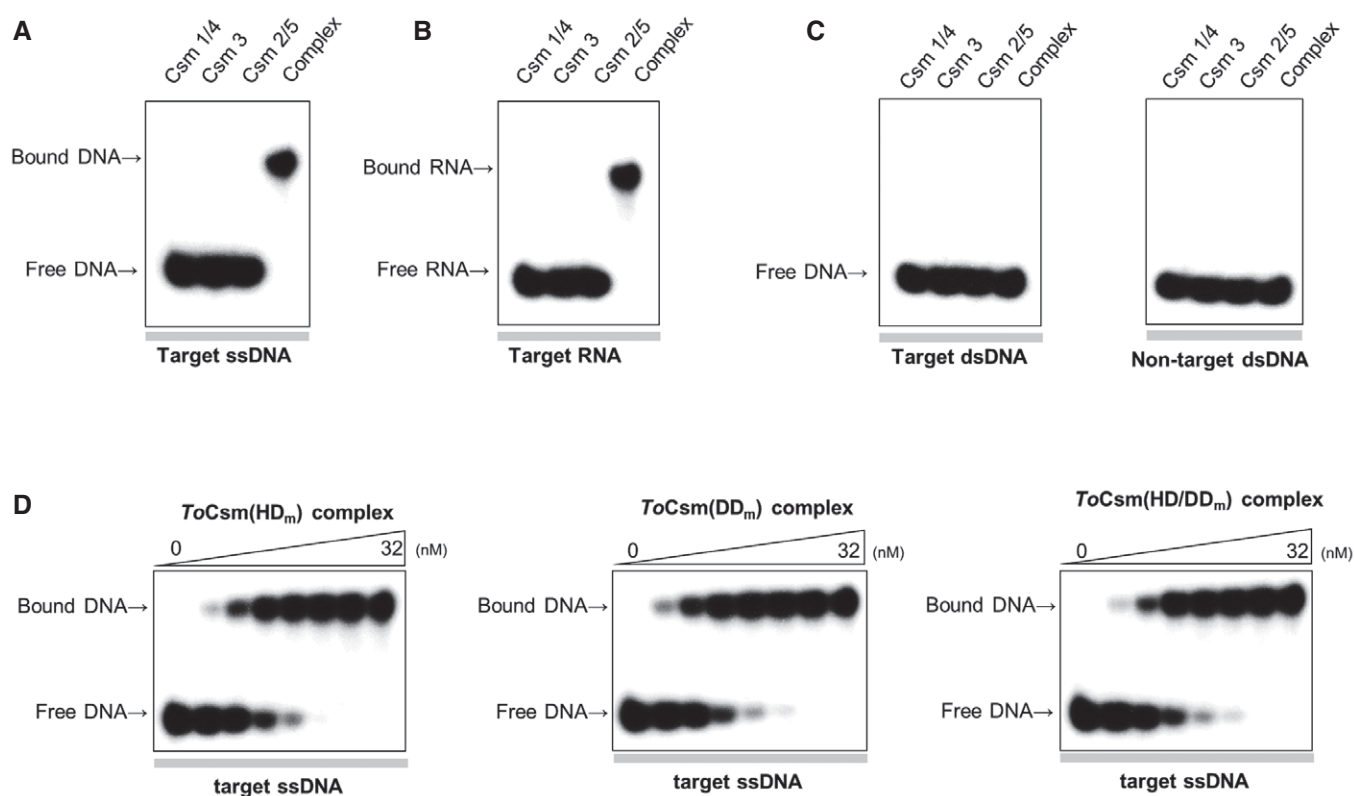**Figure EV4. EMSA analysis of the binding properties of the *ToCsm* complex.**

- A–C Analysis of the interaction between the *ToCsm* protein and target ssDNA (A), target RNA (B) and dsDNA (C).
- D Analysis of the interaction between the mutant *ToCsm* complex and target ssDNA. Mutant *ToCsm* complex containing the *ToCsm1* mutant (HD<sub>m</sub>, DD<sub>m</sub> and HD/DD<sub>m</sub>).

Source data are available online for this figure.

**Figure EV5. DNA cleavage by the ToCsm complex.**

- A Size analysis of the major fragment generated from the target ssDNA. WT represents the fragment produced by the wild-type *ToCsm* complex. "ssDNA size" indicates synthetic oligonucleotides (57, 55 and 53 nt) analysed by 15% denaturing urea-PAGE. The dotted line indicates the size of the major product.
- B Cleavage assay. 5' radio-labelled non-target ssDNA was reacted with the *ToCsm* complex in a time course.
- C Cleavage assay. Two target dsDNA substrates (with identical sequence), each radio-labelled at one of the two 5' ends, were reacted with the *ToCsm* complex.
- D, E *Trans*-cleavage of non-target ssDNA by the *ToCsm*-target ssDNA (RNA) complex. *ToCsm* complex was incubated with target ssDNA or RNA (mixed molar ratio; 1:1) and then complex with increasing concentration react circular non-target ssDNA. The *ToCsm* complexes containing a *ToCsm1* mutant are indicated as in Fig 2B. The designed 40-nt target ssDNA (RNA) contains a 30-nt target sequence in the centre (D) and designed 30-nt target ssDNA (RNA) only contains a 30-nt target sequence (E).
- F Schematic drawing of an artificial DNA duplex bound to the *ToCsm* complex. The designed duplex contains 25-nt complementary sequence at both ends. The target strand contains a 30-nt target sequence in the centre, and the non-target strand contains an 80-nt sequence not complementary to the target strand. The two DNA strands were annealed and analysed on a 2% agarose gel. Lane 1: 130-nt target ssDNA, lane 2: 130-bp annealed DNA and lane 3: 130-bp annealed DNA containing a 5'-handle-complementary sequence. The target strand and the non-target strand correspond to the non-template strand and the template strand of a transcription bubble, respectively.

Source data are available online for this figure.

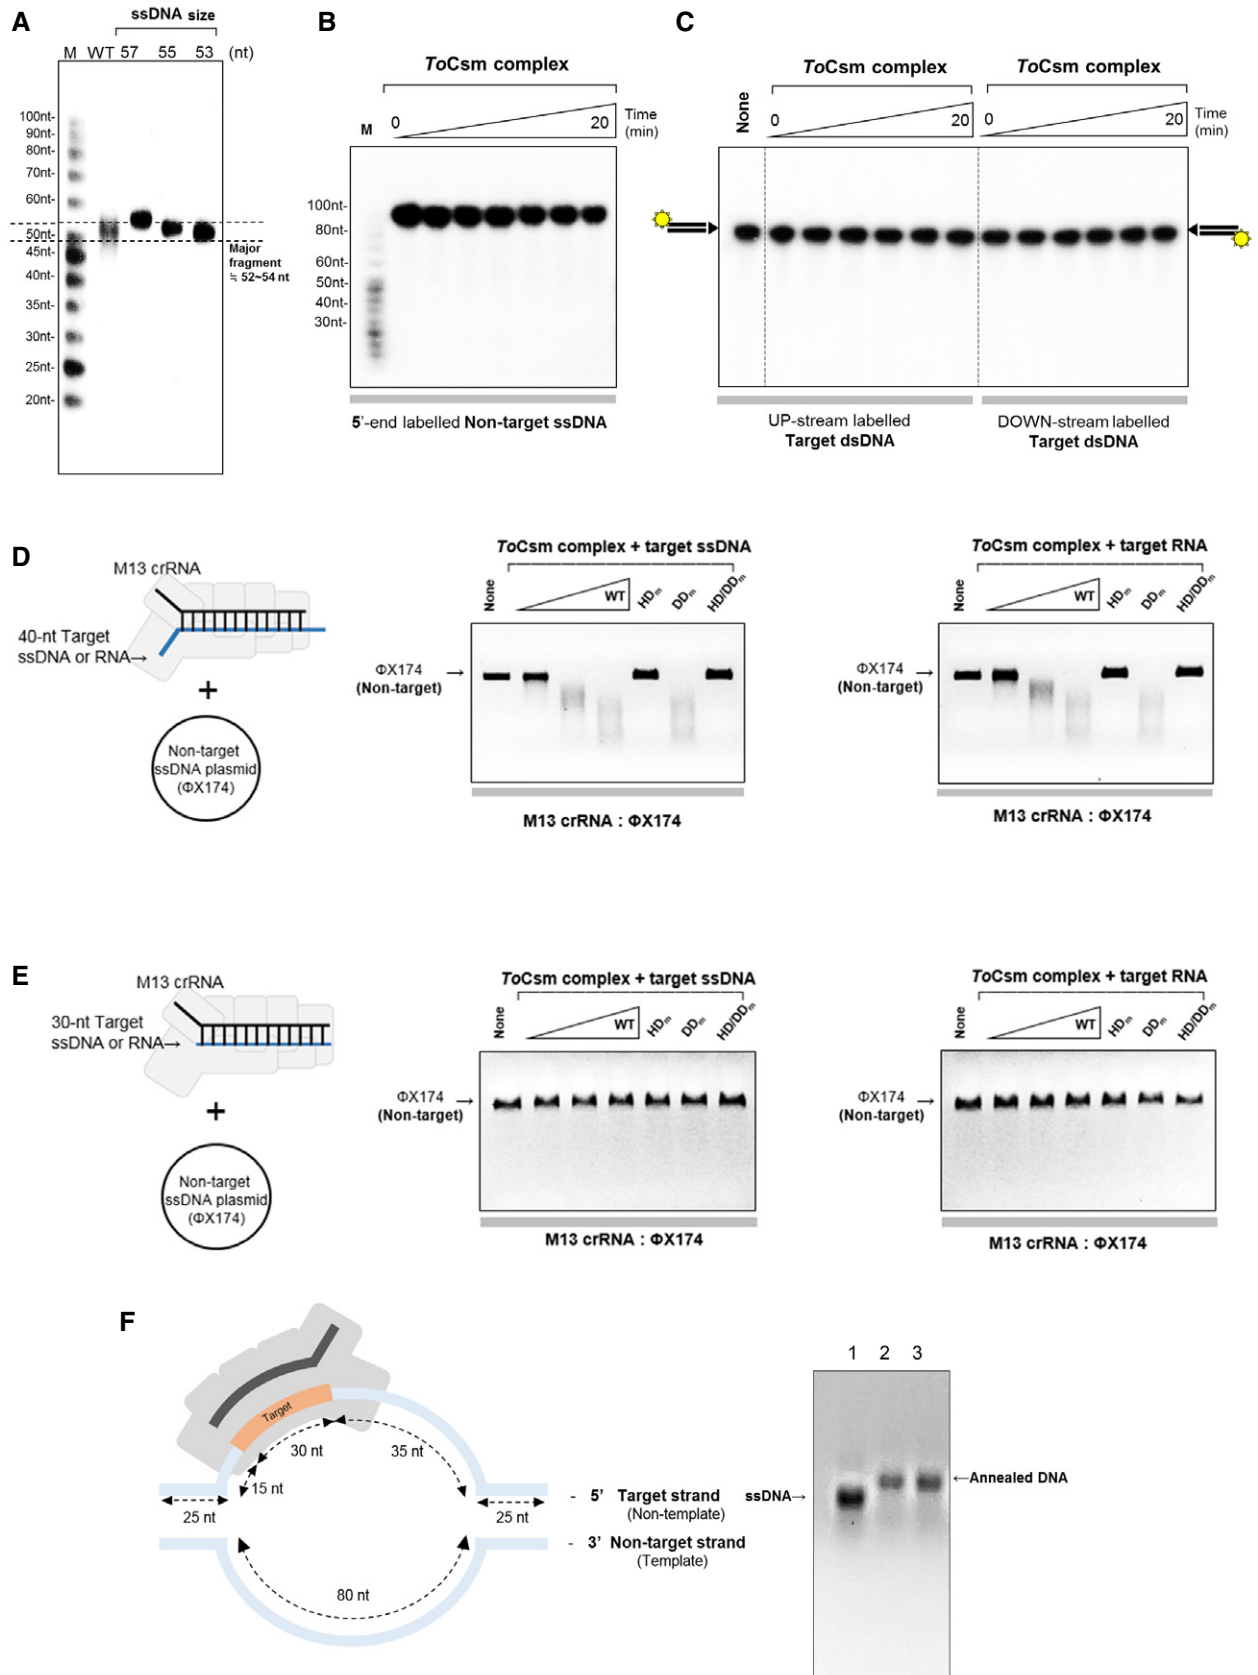

Figure EV5.
